# Supplementary material
Source: PubMed Central journal article supplement (PMC4157444)
Supplement: d-70-02316-sup1.pdf [file d-70-02316-sup1.pdf]

# **Satellite Tobacco Mosaic Virus Refined to 1.4 Å Resolution**

Steven B. Larson, John S. Day and Alexander McPherson

Department of Molecular Biology and Biochemistry, 560 Steinhaus Hall, University of California, Irvine, California 92697-3900

## **SUPPORTING INFORMATION**

**Table S1. B factor comparison between the various refinements at 1.8 Å. RT and LT refer to data sets collected at 290 K and 100 K, respectively. The maximum B factor in *SHELX-97* is 157.91 Å<sup>2</sup>. The average, minimum and maximum B factors are listed for all atoms, protein atoms, RNA atoms, ions and water oxygen atoms.**

| Programs        | RT      | LT      | RT   | LT    | RT     | LT     |
|-----------------|---------|---------|------|-------|--------|--------|
|                 | <B>all  | <B>all  | Bmin | Bmin  | Bmax   | Bmax   |
| <i>CNS cons</i> | 22.33   | 32.68   | 5.74 | 11.53 | 109.47 | 122.17 |
| <i>CNS rest</i> | 22.34   | 32.38   | 2.00 | 2.00  | 115.77 | 124.35 |
| <i>REFMAC5</i>  | 23.41   | 46.37   | 3.19 | 18.76 | 109.89 | 143.32 |
| <i>SHELX-97</i> | 25.03   | 38.63   | 0.00 | 0.00  | 157.91 | 157.91 |
|                 | <B>prot | <B>prot | Bmin | Bmin  | Bmax   | Bmax   |
| <i>CNS cons</i> | 14.10   | 23.70   | 5.74 | 15.00 | 75.49  | 85.47  |
| <i>CNS rest</i> | 13.73   | 22.90   | 2.91 | 7.01  | 75.49  | 81.52  |
| <i>REFMAC5</i>  | 15.81   | 36.56   | 6.56 | 28.52 | 64.32  | 82.63  |
| <i>SHELX-97</i> | 15.61   | 26.26   | 0.00 | 0.00  | 157.91 | 157.91 |
|                 | <B>rna  | <B>rna  | Bmin | Bmin  | Bmax   | Bmax   |
| <i>CNS cons</i> | 46.63   | 63.10   | 8.45 | 22.16 | 109.47 | 122.17 |
| <i>CNS rest</i> | 48.11   | 64.01   | 2.00 | 10.42 | 112.93 | 124.35 |
| <i>REFMAC5</i>  | 44.77   | 80.81   | 7.14 | 28.57 | 97.78  | 143.32 |
| <i>SHELX-97</i> | 53.24   | 78.34   | 0.00 | 11.43 | 157.91 | 157.91 |
|                 | <B>ions | <B>ions | Bmin | Bmin  | Bmax   | Bmax   |
| <i>CNS cons</i> | 51.02   | 55.69   | 6.41 | 11.53 | 95.38  | 83.22  |
| <i>CNS rest</i> | 60.73   | 56.56   | 2.00 | 2.00  | 115.77 | 91.16  |
| <i>REFMAC5</i>  | 57.90   | 73.72   | 3.19 | 18.76 | 109.89 | 115.79 |
| <i>SHELX-97</i> | 59.44   | 63.12   | 0.00 | 5.07  | 157.91 | 124.30 |
|                 | <B>wat  | <B>wat  | Bmin | Bmin  | Bmax   | Bmax   |
| <i>CNS cons</i> | 37.53   | 43.61   | 7.31 | 18.29 | 74.33  | 81.49  |
| <i>CNS rest</i> | 37.01   | 42.84   | 6.04 | 15.45 | 93.02  | 100.16 |
| <i>REFMAC5</i>  | 38.08   | 55.36   | 8.33 | 28.91 | 87.73  | 118.50 |
| <i>SHELX-97</i> | 41.47   | 54.12   | 6.24 | 17.31 | 157.91 | 157.91 |

**Table S2. R.m.s. deviations between models from refinements using the programs *CNS*, *REFMAC5* and *SHELX-97*. The upper triangle contains the deviations between protein models and the lower triangle contains the deviations between RNA models. RT and LT refer to data collected at 290 K and 100 K, respectively.**

|    |                  | RT                   |                      |                             |                             | LT (1.45 Å)          |                      |                             |                             |   |
|----|------------------|----------------------|----------------------|-----------------------------|-----------------------------|----------------------|----------------------|-----------------------------|-----------------------------|---|
|    |                  | <i>CNS</i> -<br>cons | <i>CNS</i> -<br>rest | <i>REF</i> -<br><i>MAC5</i> | <i>SHELX</i> -<br><i>97</i> | <i>CNS</i> -<br>cons | <i>CNS</i> -<br>rest | <i>REF</i> -<br><i>MAC5</i> | <i>SHELX</i> -<br><i>97</i> |   |
| RT | <i>CNS</i> -cons |                      | 0.108                | 0.113                       | 0.147                       | 0.415                | 0.444                | 0.443                       | 0.451                       | P |
|    | <i>CNS</i> -rest | 0.573                |                      | 0.041                       | 0.103                       | 0.429                | 0.431                | 0.430                       | 0.439                       | R |
|    | <i>REFMAC5</i>   | 0.146                | 0.118                |                             | 0.090                       | 0.431                | 0.434                | 0.430                       | 0.439                       | O |
|    | <i>SHELX-97</i>  | 0.149                | 0.166                | 0.575                       |                             | 0.439                | 0.442                | 0.437                       | 0.441                       | T |
| LT | <i>CNS</i> -cons | 0.814                | 0.946                | 0.280                       | 0.313                       |                      | 0.159                | 0.161                       | 0.176                       | E |
|    | <i>CNS</i> -rest | 0.902                | 1.147                | 0.345                       | 0.363                       | 0.632                |                      | 0.039                       | 0.080                       | I |
|    | <i>REFMAC5</i>   | 0.335                | 0.297                | 0.817                       | 1.070                       | 0.273                | 0.070                |                             | 0.066                       | N |
|    | <i>SHELX-97</i>  | 0.814                | 0.946                | 0.292                       | 0.323                       | 0.225                | 0.174                | 0.157                       |                             |   |

RNA

**Table S3. R factor comparisons for the various refinements at 1.8Å. RT and LT refer to data sets collected at 290 K and 100 K, respectively.**

| Programs        | RT                | LT                | $\Delta R_{\text{free}}(\text{LT-RT})$ |
|-----------------|-------------------|-------------------|----------------------------------------|
|                 | R <sub>free</sub> | R <sub>free</sub> |                                        |
| <i>CNS cons</i> | 0.1735            | 0.2549            | 0.0814                                 |
| <i>CNS rest</i> | 0.1715            | 0.2407            | 0.0692                                 |
| <i>REFMAC5</i>  | 0.1629            | 0.2162            | 0.0533                                 |
| <i>SHELX-97</i> | 0.1811            | 0.2372            | 0.0561                                 |

  

| Programs        | R      | R      | $\Delta R(\text{LT-RT})$ |
|-----------------|--------|--------|--------------------------|
|                 | R      | R      |                          |
| <i>CNS cons</i> | 0.1719 | 0.2527 | 0.0808                   |
| <i>CNS rest</i> | 0.1445 | 0.2076 | 0.0631                   |
| <i>REFMAC5</i>  | 0.1355 | 0.1802 | 0.0447                   |
| <i>SHELX-97</i> | 0.1484 | 0.2072 | 0.0588                   |

  

| Programs        | R <sub>free-R</sub> | R <sub>free-R</sub> |
|-----------------|---------------------|---------------------|
|                 | <i>CNS cons</i>     | 0.0016              |
| <i>CNS rest</i> | 0.0270              | 0.0331              |
| <i>REFMAC5</i>  | 0.0274              | 0.0302              |
| <i>SHELX-97</i> | 0.0327              | 0.0300              |

**Table S4. Differences between the expanded constrained and the restrained low temperature 1.4 Å models expressed as r.m.s. deviations and centroid differences between corresponding subunits. The maximum deviation for any atom used in the r.m.s. deviation calculations and the residue containing that atom are identified in the last two columns. Maximum values for the r.m.s. deviation, centroid difference and difference between them are in bold. The four highlighted subunits (D, F, K and N) are the principal contact points between particles in the crystal lattice.**

A. Differences in monomer subunits based on CA positions

| chain ID | Rms dev<br>aa 17-159 | centroid difference<br>aa 17-159 | difference   | aa # | Max dev |
|----------|----------------------|----------------------------------|--------------|------|---------|
| A        | 0.140                | 0.088                            | 0.052        | S105 | 0.404   |
| B        | 0.080                | 0.058                            | 0.022        | M22  | 0.174   |
| C        | 0.090                | 0.065                            | 0.025        | M22  | 0.175   |
| D        | 0.195                | 0.170                            | 0.025        | T71  | 0.602   |
| E        | 0.102                | 0.087                            | 0.015        | R148 | 0.190   |
| F        | 0.187                | 0.161                            | 0.026        | T71  | 0.537   |
| G        | 0.086                | 0.062                            | 0.024        | S46  | 0.192   |
| H        | 0.101                | 0.081                            | 0.020        | D18  | 0.203   |
| I        | 0.194                | 0.155                            | 0.039        | S105 | 0.417   |
| J        | 0.139                | 0.119                            | 0.020        | F109 | 0.219   |
| K        | 0.177                | 0.130                            | 0.047        | I51  | 0.516   |
| L        | 0.157                | 0.145                            | 0.012        | R24  | 0.258   |
| M        | <b>0.208</b>         | <b>0.199</b>                     | 0.009        | G50  | 0.314   |
| N        | 0.173                | 0.119                            | <b>0.054</b> | I51  | 0.498   |
| O        | 0.124                | 0.102                            | 0.022        | G50  | 0.203   |

B. Differences in monomer subunits based on all highest occupied atomic positions

| chain ID | Rms dev<br>aa 17-159 | centroid difference<br>aa 17-159 | difference   | aa # | Max dev |
|----------|----------------------|----------------------------------|--------------|------|---------|
| A        | 0.189                | 0.092                            | <b>0.097</b> | K97  | 1.957   |
| B        | 0.110                | 0.061                            | 0.049        | R24  | 0.673   |
| C        | 0.115                | 0.069                            | 0.046        | R24  | 0.801   |
| D        | 0.225                | 0.173                            | 0.052        | K54  | 2.813   |
| E        | 0.120                | 0.085                            | 0.035        | R24  | 0.798   |
| F        | 0.211                | 0.163                            | 0.048        | K54  | 2.280   |
| G        | 0.106                | 0.060                            | 0.046        | R24  | 0.697   |
| H        | 0.119                | 0.078                            | 0.041        | R24  | 0.831   |
| I        | <b>0.228</b>         | 0.154                            | 0.074        | K97  | 2.423   |
| J        | 0.166                | 0.125                            | 0.041        | K97  | 1.216   |
| K        | 0.203                | 0.127                            | 0.076        | F53  | 1.294   |
| L        | 0.172                | 0.147                            | 0.025        | R24  | 0.513   |
| M        | 0.220                | <b>0.201</b>                     | 0.019        | R24  | 0.620   |
| N        | 0.199                | 0.117                            | 0.082        | F53  | 1.309   |
| O        | 0.151                | 0.098                            | 0.053        | M22  | 1.175   |
